# Supplementary material
Source: Research Square preprint supplement (doi:10.21203/rs.3.rs-9759845/v1)
Supplement: Supplementary file 1 [file 92906c77941e381b8dcc088e.docx]

**Specific remarks**

**Authors should answer the below three questions during submission:**

1. **What is your main contribution to the field?**

The main contribution of this research is to demonstrate the importance of applying an appropriate aging heat treatment to aluminum alloys to improve the performance of products obtained by AM, as well as to highlight the anisotropy of mechanical properties and the presence of porosity. Our work is focused on an aluminum alloy that is not commonly manufactured by AM.

1. **What is novel? In theory, in experimental techniques, or a combination of both?**

In recent years, research on AM-processed aluminum alloys has focused primarily on improving their static tensile properties. However, fracture caused by the presence of cracks represents one of the most critical failure modes in engineering applications. Therefore, evaluating the suitability of AM-processed materials based solely on their static properties is inadequate. It is necessary to investigate parameters provided by Fracture Mechanics, such as fracture toughness and fatigue resistance, for their practical implementation in structural components.

1. **Does your paper have industrial applications? If yes, who are the likely user?**

The references cited in our paper attest to a wide variety of potential applications for large and complex aluminum alloy structures produced by AM based on the DED-Arc technique, primarily for use in the aerospace and transportation fields. Furthermore, the adoption of AM processing technologies such as DED-Arc has been increasing consistently, not only for part repairing but also for meter-size component manufacturing, with fracture toughness and fatigue crack growth resistance as decisive parameters for part design and maintenance engineering procedures.
